# Supplementary material for: A highly flexible and repeatable genotyping method for aquaculture studies based on target amplicon sequencing using next-generation sequencing technology
Source: PubMed Central journal article supplement (PMC6502806; doi:10.1038/s41598-019-43336-x), 2019-05-06
Supplement: 41598_2019_43336_MOESM1_ESM.pdf [file 41598_2019_43336_MOESM1_ESM.pdf]

## **Supplementary information**

### **A highly flexible and repeatable genotyping method for aquaculture studies based on target amplicon sequencing using next-generation sequencing technology**

Mana Sato<sup>1</sup>, Sho Hosoya<sup>1\*</sup>, Sota Yoshikawa<sup>1,2</sup>, Shun Ohki<sup>1</sup>, Yuki Kobayashi<sup>3</sup>, Takuya Itou<sup>3</sup>, Kiyoshi Kikuchi<sup>1</sup>

<sup>1</sup>Fisheries Laboratory, University of Tokyo, Hamamatsu, 431-0214, Japan.

<sup>2</sup>Seed production Technology Development Center, Nagasaki Prefectural Institute of Fisheries, Nagasaki, 851-2213, Japan

<sup>3</sup>Veterinary Research Center, Nihon University, Kanagawa, 252-0880, Japan

\*Correspondence.

Sho Hosoya

E-mail address: [ahosoya@mail.ecc.u-tokyo.ac.jp](mailto:ahosoya@mail.ecc.u-tokyo.ac.jp)

**Supplementary Figures S1-S3**

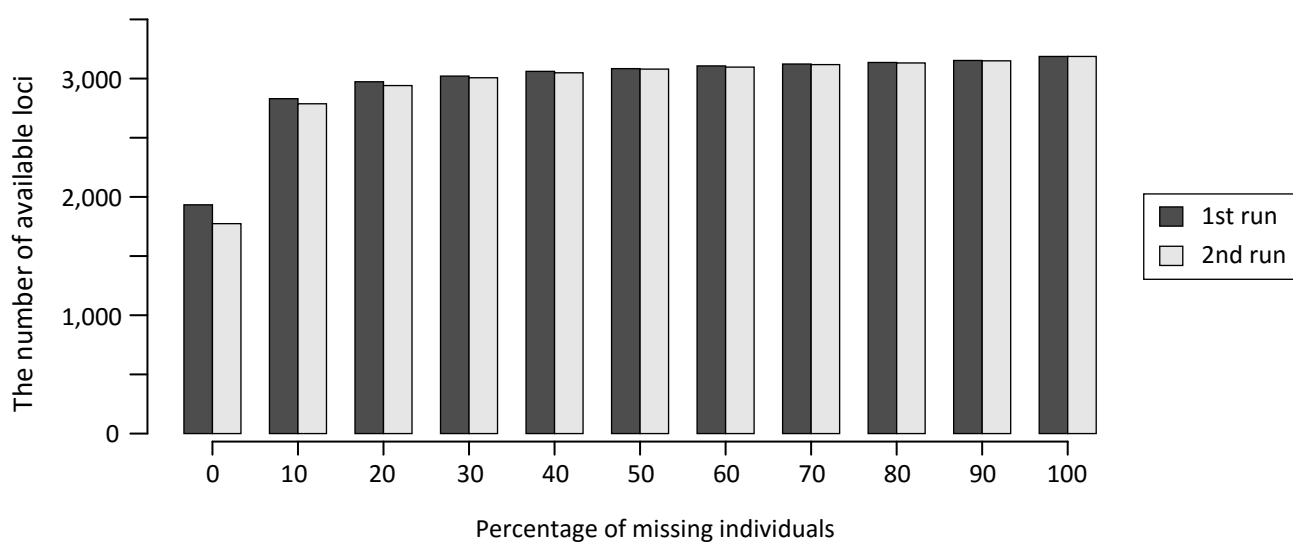

**Supplementary Figure S1.** The number of available loci with different levels of missing rates of genotyped individuals. Zero-percent indicates the number of available loci with no missing data, whereas the number of available loci with 100% missing is equivalent to the total number of targeted loci, i.e. 3,187 loci.

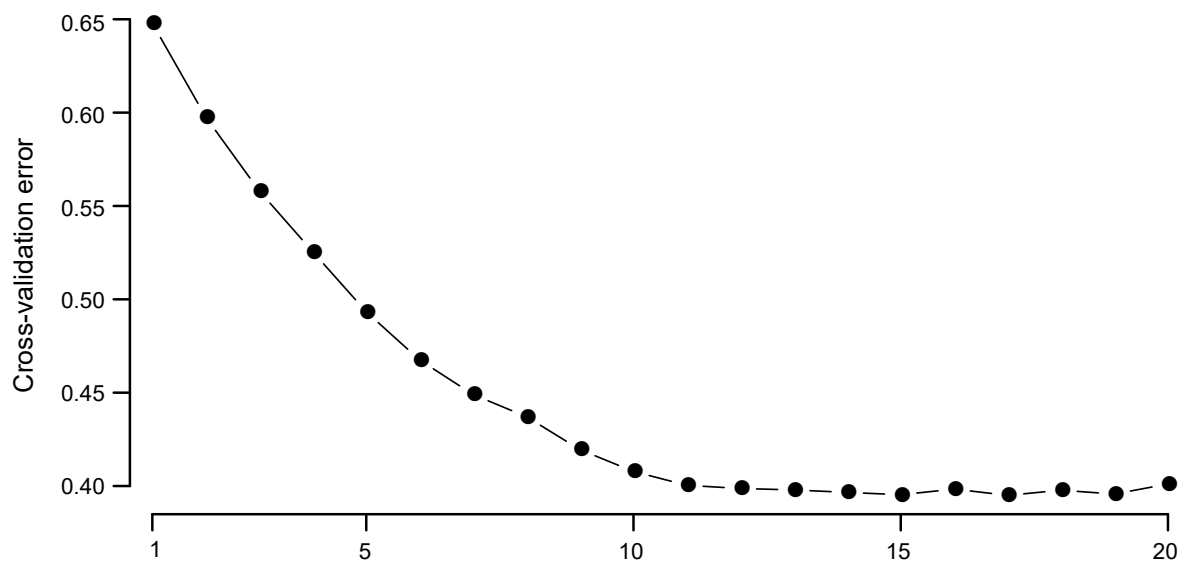

**Supplementary Figure S2.** Plot shows the error rate estimated by cross validation test for each  $K$  in the ADMIXTURE analysis from  $K=1$  through  $K=20$ .

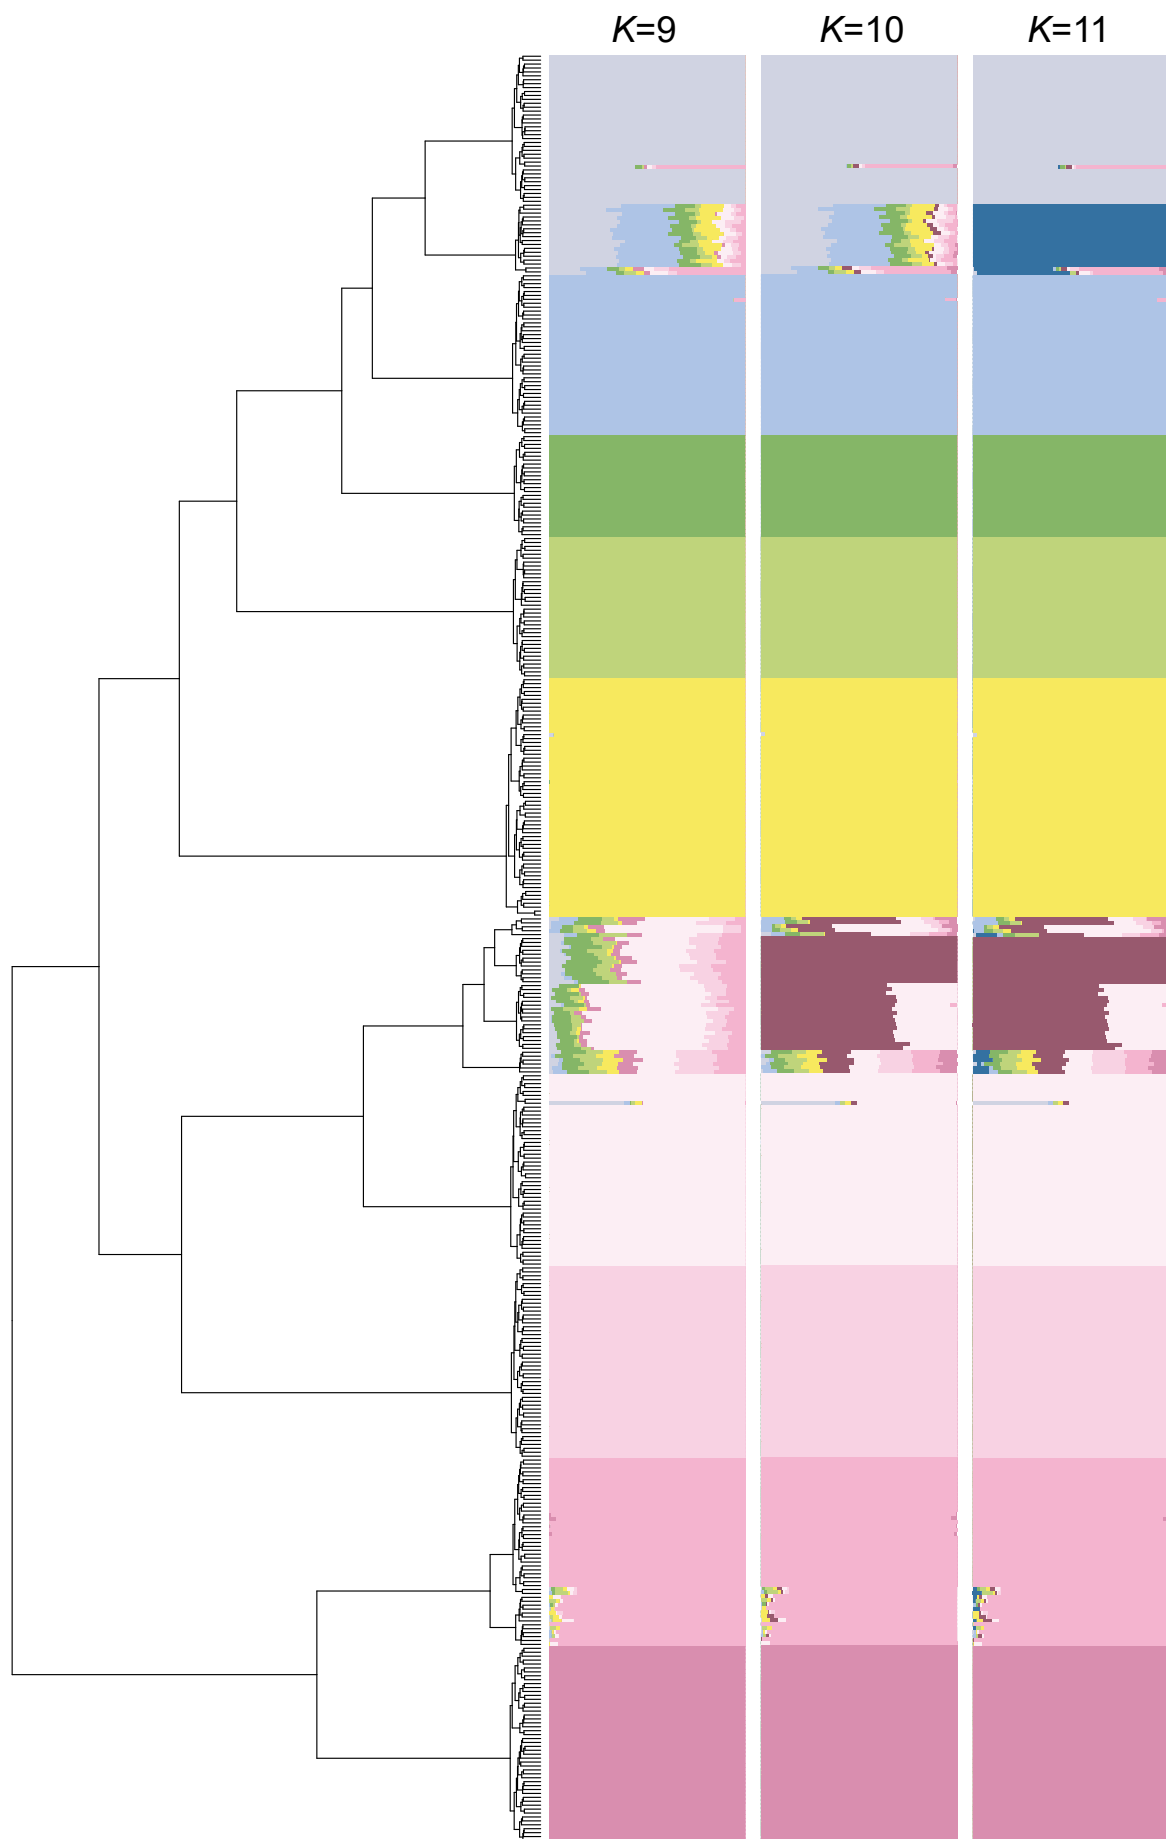

**Supplementary Figure S3.** Hierarchical clustering and population structure plots of the cultured population. The admixture proportions of individuals were estimated by ADMIXTURE software ( $K=9$  to  $K=11$ )
